# Supplementary material for: Spatial Analysis Reveals Impaired Immune Cell Function within the Tumor Microenvironment of HIV-associated Non-small Cell Lung Cancer
Source: bioRxiv or medRxiv preprint supplement (doi:10.1101/2023.10.21.23297229), 2023-11-18

# Supplemental Table 1: Patients and Demographics

| Patient Characteristics       | HIV-NSCLC<br>N=18 |      | Uninfected<br>N=19 |     | P-value |
|-------------------------------|-------------------|------|--------------------|-----|---------|
|                               | N                 | %    | N                  | %   |         |
| Median age                    | 54.1              |      | 57.2               |     | 0.22    |
| Gender                        |                   |      |                    |     | 0.06    |
| Male                          | 14                | 78%  | 9                  | 47% |         |
| Female                        | 4                 | 22%  | 10                 | 53% |         |
| Smoking Status                |                   |      |                    |     | 0.49    |
| Non-smoker                    | 0                 | 0%   | 2                  | 11% |         |
| Smoking History               | 18                | 100% | 17                 | 89% |         |
| Year of Diagnosis             |                   |      |                    |     | 0.7     |
| 1999-2004                     | 4                 | 22%  | 6                  | 32% |         |
| 2005-2010                     | 8                 | 44%  | 6                  | 32% |         |
| 2011-2016                     | 6                 | 33%  | 7                  | 37% |         |
| Histology                     |                   |      |                    |     | 0.77    |
| Adenocarcinoma                | 8                 | 44%  | 10                 | 53% |         |
| Squamous Cell                 | 8                 | 44%  | 8                  | 42% |         |
| NSCLC (unspecified)           | 2                 | 11%  | 1                  | 5%  |         |
| Stage at diagnosis            |                   |      |                    |     | 0.96    |
| Stage I                       | 6                 | 33%  | 6                  | 32% |         |
| Stage II                      | 1                 | 6%   | 2                  | 11% |         |
| Stage III                     | 4                 | 22%  | 4                  | 21% |         |
| Stage IV                      | 7                 | 39%  | 7                  | 37% |         |
| <b>Years of HIV Diagnosis</b> |                   |      |                    |     |         |
| Median                        | 17                | -    |                    |     |         |
| Range                         | 2-36              | -    |                    |     |         |
| AIDS Diagnosis                | 8                 | 44%  |                    |     |         |
| HIV VL (copies/mL)            |                   |      |                    |     |         |
| <400                          | 8                 | 44%  |                    |     |         |
| >400                          | 10                | 56%  |                    |     |         |
| CD4 count (cells/ $\mu$ L)    |                   |      |                    |     |         |
| Median                        | 440               | -    |                    |     |         |
| Range                         | 26-872            | -    |                    |     |         |

**Supplemental Table 2: Number of T cells within TME**

|       | P value  | Mean (HIV) | Mean (non-HIV) | Difference | SE of difference | t ratio | df | q value  |
|-------|----------|------------|----------------|------------|------------------|---------|----|----------|
| CK+   | 0.170988 | 1236       | 1564           | 328.8      | 237.3            | 1.386   | 60 | 0.703621 |
| CD8+  | 0.083642 | 170.2      | 72             | -98.16     | 55.54            | 1.767   | 47 | 0.697019 |
| CD4+  | 0.253303 | 57.74      | 94.84          | 37.11      | 32.1             | 1.156   | 49 | 0.703621 |
| CD68+ | 0.371457 | 115.8      | 82.43          | -33.32     | 36.97            | 0.9014  | 53 | 0.773868 |

# Supplementary Figure S1: Tumor Killing Assay with Circulating Cells from PWH and PWOH (A549)

## T-cell dysfunction marker

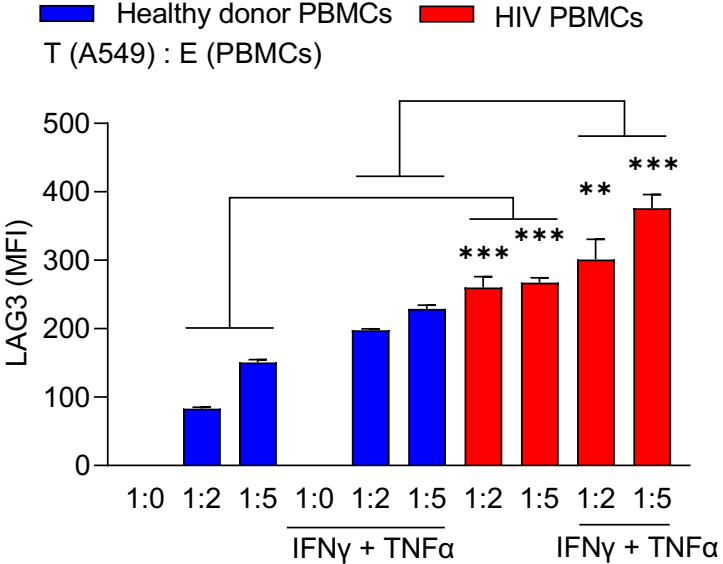

## Apoptotic cell death marker

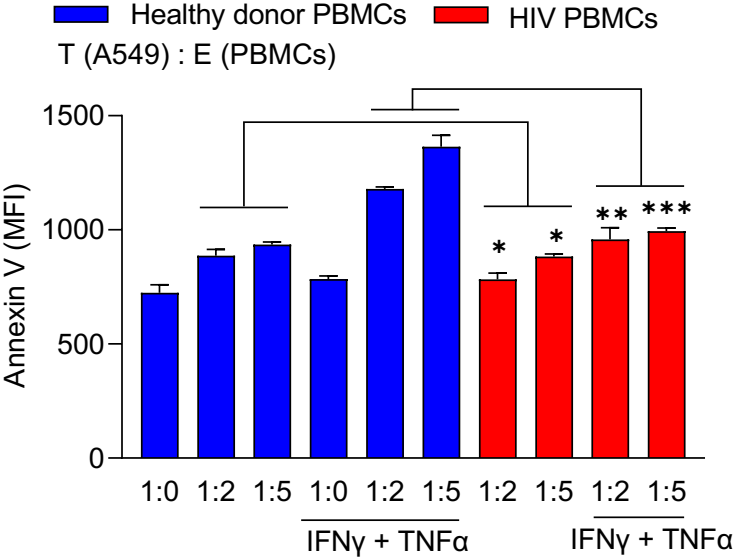

## T-cell activation marker

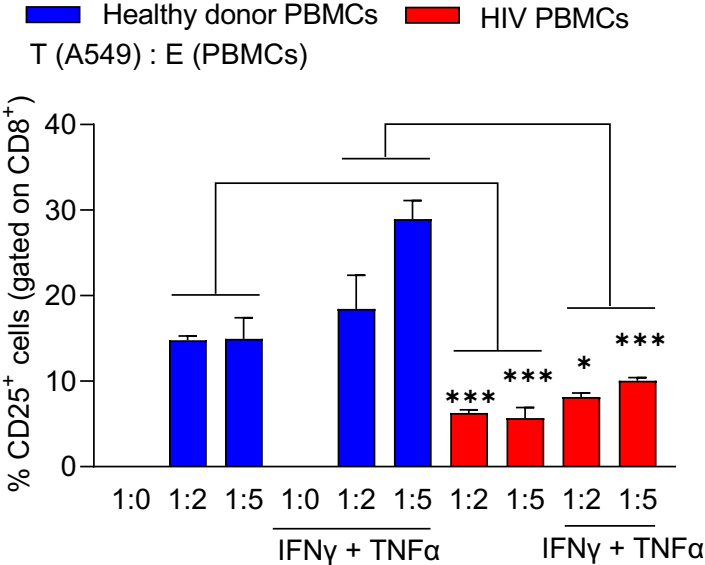

Supplement: Supplementary file [file media-1.pdf]
